# Supplementary material for: Strengths of covalent bonds in LnO2 determined from O K-edge XANES spectra using a Hubbard model
Source: Royal Society of Chemistry journal article supplement (doi:10.1039/d3sc03304j), 2023-01-01
Supplement: d3sc03304j1.pdf [file d3sc03304j1.pdf]

## Supplementary Information for

Strengths of covalent bonds in LnO<sub>2</sub> determined from O K-edge XANES spectra using a Hubbard model

Wayne W. Lukens\*, Stefan G. Minasian, and Corwin H. Booth

Chemical Sciences Division  
Lawrence Berkeley National Laboratory  
Berkeley, CA 94720

## Contents

|                                                                                             |     |
|---------------------------------------------------------------------------------------------|-----|
| Hubbard molecule model for CeO <sub>2</sub> : O 2p and Ce 4f, A <sub>2u</sub> mixing        | S2  |
| Hubbard molecule model for PrO <sub>2</sub> : O 2p and Ln 4f, A <sub>2u</sub> mixing        | S3  |
| Hubbard molecule model for TbO <sub>2</sub> : O 2p and Ln 4f, A <sub>2u</sub> mixing        | S4  |
| Hubbard molecule model for LnO <sub>2</sub> : O 2p and Ln 5d, E <sub>g</sub> mixing         | S5  |
| Hubbard molecule model for LnO <sub>2</sub> : O 2p and Ln 5d, T <sub>2g</sub> mixing        | S6  |
| HMM to second order for CeO <sub>2</sub> 4f interaction                                     | S7  |
| HMM to second order for PrO <sub>2</sub> and TbO <sub>2</sub> 4f interactions.              | S8  |
| HMM to second order for LnO <sub>2</sub> : O 2p and Ln 5d interactions                      | S9  |
| Experimental details                                                                        | S10 |
| References                                                                                  | S11 |
| <b>Figure S3.</b> Tauc plots for CeO <sub>2</sub> from the data published by Niwano, et al. | S12 |
| <b>Figure S4.</b> Tauc plots for CeO <sub>2</sub> O K-edge XANES pre-edge peaks.            | S13 |
| <b>Figure S5.</b> Tauc plots for PrO <sub>2</sub> O K-edge XANES pre-edge peaks.            | S14 |
| <b>Figure S6.</b> Tauc plots for TbO <sub>2</sub> O K-edge XANES pre-edge peaks.            | S15 |
| <b>Figure S7.</b> Magnetic Susceptibility of CeO <sub>2</sub> from Aldrich.                 | S16 |
| <b>Figure S8.</b> Magnetic Susceptibility of CeO <sub>2</sub> from Strem.                   | S16 |

*Hubbard molecule model for CeO<sub>2</sub>: O 2p and Ce 4f, (A<sub>2u</sub>) mixing*

For CeO<sub>2</sub>, the unperturbed ground state is |L<sup>1</sup>4f<sup>1</sup>⟩, which consists of four wavefunctions ψ<sub>1</sub>-ψ<sub>4</sub>. This state corresponds to a “hole” in the O 2p A<sub>2u</sub><sup>1</sup> orbital (L<sup>1</sup>) and one electron in the Ce 4f A<sub>2u</sub> orbital (4f<sup>1</sup>), which is the main component of the Γ<sub>7</sub> state if spin orbit coupling is included. The energy of ψ<sub>1</sub>-ψ<sub>4</sub> is assigned as 0. The excited state that interacts with |L<sup>1</sup>4f<sup>1</sup>⟩ is |L<sup>2</sup>4f<sup>0</sup>⟩ and consists of a single wavefunction ψ<sub>5</sub>. The energy of |L<sup>1</sup>4f<sup>1</sup>⟩ is set to zero, and the energy of |L<sup>2</sup>4f<sup>0</sup>⟩ is U'. The individual states are shown in Table S1. Only states in which the electron can hop from the occupied O 2p A<sub>2u</sub> orbitals into the Ce 4f orbital without changing sign may interact with ψ<sub>5</sub>; these states are ψ<sub>1</sub> and ψ<sub>4</sub>. In other words, only ψ<sub>1</sub> and ψ<sub>4</sub> have non-zero, off-diagonal matrix elements. The other states cannot interact with ψ<sub>5</sub> and are excluded from the model.

Table S1: A<sub>2u</sub> symmetry, L<sup>1</sup> 4f<sup>1</sup> basis states for the Hubbard molecule model of LnO<sub>2</sub>. Only the states in red are used in the model.

|                    | 4f <sup>1</sup> (↑) | 4f <sup>1</sup> (↓) |
|--------------------|---------------------|---------------------|
| L <sup>1</sup> (↓) | ψ <sub>1</sub>      | ψ <sub>3</sub>      |
| L <sup>1</sup> (↑) | ψ <sub>2</sub>      | ψ <sub>4</sub>      |

ψ<sub>5</sub> is |L<sup>2</sup>Γ<sub>7</sub><sup>0</sup>⟩

The Hubbard molecule model Hamiltonian for the interaction between the |L<sup>1</sup>4f<sup>1</sup>⟩ and |L<sup>2</sup>Γ<sub>7</sub><sup>0</sup>⟩ in CeO<sub>2</sub> can be described using the following matrix,

$$\mathbf{A} = \begin{pmatrix} 0 & 0 & -t \\ 0 & 0 & -t \\ -t & -t & U' \end{pmatrix}, \text{ where } \begin{pmatrix} 1 \\ 0 \\ 0 \end{pmatrix} = \psi_1, \begin{pmatrix} 0 \\ 1 \\ 0 \end{pmatrix} = \psi_4, \text{ and } \begin{pmatrix} 0 \\ 0 \\ 1 \end{pmatrix} = \psi_5,$$

t is the electron hopping term (interaction integral), which is analogous to the off-diagonal matrix element, H<sub>ij</sub>, (orbital interaction integral) in MO theory, and U is the energy of the unperturbed excited state with respect to the ground state.

The eigenvalues are 0 and  $E_{\pm} = \frac{1}{2}(U' \pm \sqrt{U'^2 + 8t^2})$ . The eigenvectors of interest are ψ<sub>±</sub>, which have energies E<sub>±</sub>. The eigenvectors are determined from  $\mathbf{A} - E_{\pm}\mathbf{I} = \mathbf{0}$ . From the first 2 rows of  $\mathbf{A}$ , a<sub>1</sub> = a<sub>4</sub> and  $E_{\pm}a_1 = -ta_5$  or a<sub>5</sub> = -(E<sub>±</sub>/t) a<sub>1</sub>, where a<sub>i</sub> is the coefficient of ψ<sub>i</sub>. Using a<sub>1</sub> = 1, the unnormalized wavefunction is ψ<sub>±</sub> = ψ<sub>1</sub> + ψ<sub>4</sub> - (E<sub>±</sub>/t)ψ<sub>5</sub>. The normalization constant, N, is 1/√(2 + (E<sub>±</sub>/t)<sup>2</sup>). The ψ<sub>±</sub> can be simplified by dividing by √2 to give ψ<sub>±</sub> =

$N[(\psi_1 + \psi_4)/\sqrt{2} - (E_{\pm}/\sqrt{2}t)\psi_5]$ , with  $N=1/\sqrt{1 + (E_{\pm}/\sqrt{2}t)^2}$ . Finally, (ψ<sub>1</sub> + ψ<sub>4</sub>)/√2 can be more conveniently represented as |L<sup>1</sup>4f<sup>1</sup>⟩ and ψ<sub>5</sub> by |L<sup>2</sup>4f<sup>0</sup>⟩, to give the following:

$$E_{\pm} = \frac{1}{2}(U' \pm \sqrt{U'^2 + 8t^2}) \text{ and } \psi_{\pm} = N(|L^1 4f^1\rangle + \lambda|L^2 4f^0\rangle) \text{ where } N=1/\sqrt{1 + \lambda^2}, \lambda = -E_{\pm}/\sqrt{2}t.$$

$$E_{\text{MLCT}} = \sqrt{U'^2 + 8t^2} \text{ and } n_f = 1/N^2.$$

*Hubbard molecule model for PrO<sub>2</sub>: O 2p and Ln 4f, A<sub>2u</sub> mixing*

The ground state of Pr<sup>4+</sup> in cubic symmetry is 4f<sup>1</sup>. As discussed for CeO<sub>2</sub>, the f-orbital that most strongly interacts with the oxygen orbitals is A<sub>2u</sub>, which is unoccupied in Pr<sup>4+</sup>. Since the only portion of the Pr wavefunction involved in the HMM is the single electron in the A<sub>2u</sub> orbital, the HMM for PrO<sub>2</sub> is identical to that of CeO<sub>2</sub>.

*Hubbard molecule model for TbO<sub>2</sub>: O 2p and Ln 4f, A<sub>2u</sub> mixing*

Unlike CeO<sub>2</sub> and PrO<sub>2</sub>, the unperturbed ground state of TbO<sub>2</sub> in the HMM involves a tetravalent lanthanide and has two electrons in the OA<sub>2u</sub> (L<sup>2</sup>) orbital. In the unperturbed ground state, |L<sup>2</sup>4f<sup>7</sup>⟩, the oxygen A<sub>2u</sub> orbital is doubly occupied and each of the f-orbitals is singly occupied. While the actual ground state is an octet, in the HMM, the ground state is simplified to a doublet: ψ<sub>1</sub> is spin up and ψ<sub>2</sub> is spin down. Likewise, in the unperturbed charge transfer state, the oxygen A<sub>2u</sub> orbital is singly occupied, and the corresponding orbital on Tb is double occupied: ψ<sub>3</sub> is spin up and ψ<sub>4</sub> is spin down. Only ψ<sub>3</sub> can interact with ψ<sub>1</sub>, and only ψ<sub>4</sub> can interact with ψ<sub>2</sub>. The energy of |L<sup>2</sup>4f<sup>7</sup>⟩ is set to zero, and the energy of |L<sup>1</sup>4f<sup>8</sup>⟩ is U'.

Table S1: A<sub>2u</sub> symmetry, L<sup>1</sup> 4f<sup>8</sup> basis states for the Hubbard molecule model of TbO<sub>2</sub>.

|                    | 4f <sup>8</sup> (↓↑) |
|--------------------|----------------------|
| L <sup>1</sup> (↑) | ψ <sub>3</sub>       |
| L <sup>1</sup> (↓) | ψ <sub>4</sub>       |

ψ<sub>1</sub> is |L<sup>2</sup>4f<sup>7</sup>↑⟩; ψ<sub>2</sub> is |L<sup>2</sup>4f<sup>7</sup>↓⟩

The Hubbard molecule model Hamiltonian for TbO<sub>2</sub> can be described using the following matrix, **A**,

$$\mathbf{A} = \begin{pmatrix} 0 & 0 & -t & 0 \\ 0 & 0 & 0 & -t \\ -t & 0 & U' & 0 \\ 0 & -t & 0 & U' \end{pmatrix}, \text{ where } \begin{pmatrix} 1 \\ 0 \\ 0 \\ 0 \end{pmatrix} = \psi_1, \begin{pmatrix} 0 \\ 1 \\ 0 \\ 0 \end{pmatrix} = \psi_2, \begin{pmatrix} 0 \\ 0 \\ 1 \\ 0 \end{pmatrix} = \psi_3, \text{ and } \begin{pmatrix} 0 \\ 0 \\ 0 \\ 1 \end{pmatrix} = \psi_4$$

The eigenvalues for the model are  $E_{\pm} = \frac{1}{2}(U' \pm \sqrt{U'^2 + 4t^2})$ . The only eigenvectors we care about are ψ<sub>±</sub>, which have energies E<sub>±</sub>. The eigenvectors are determined by solving **A**-E<sub>±</sub>**I** = **0**. From the first 2 rows of **A**, we get E<sub>±</sub>a<sub>2</sub>=-t a<sub>4</sub> and E<sub>±</sub>a<sub>1</sub>=-t a<sub>3</sub>, where a<sub>i</sub> is the coefficient of ψ<sub>i</sub>. The ground and excited states are doubly degenerate. Using a<sub>1</sub> = 1, we get ψ<sub>±1</sub> = ψ<sub>1</sub> - (E<sub>±</sub>/t)ψ<sub>3</sub> and ψ<sub>±2</sub> = ψ<sub>2</sub> - (E<sub>±</sub>/t)ψ<sub>4</sub>, which is not normalized. The normalization constant, N, is 1/√(1 + (E<sub>±</sub>/t)<sup>2</sup>). For TbO<sub>2</sub>, the HMM gives the following result:

$$E_{\pm} = \frac{1}{2}(U' \pm \sqrt{U'^2 + 4t^2}), \psi_{\pm 1} = N[|L^2 4f^7 \uparrow\rangle + \lambda |L \uparrow 4f^8\rangle]; \psi_{\pm 2} = N[|L^2 4f^7 \downarrow\rangle + \lambda |L \downarrow 4f^8\rangle] \text{ where } N=1/\sqrt{1 + \lambda^2} \text{ and } \lambda = -E_{\pm}/t.$$

$$E_{\text{MLCT}} = \sqrt{U'^2 + 4t^2} \text{ and } n_f = 2(\lambda^2/N^2).$$

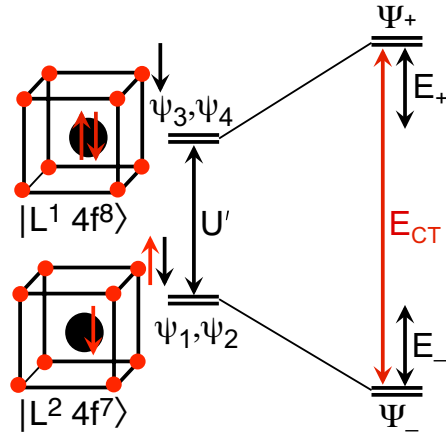

**Figure S1.** HMM for the 4f interaction in  $\text{TbO}_2$ .

*Hubbard molecule model for LnO<sub>2</sub>: O 2p and Ln 5d, E<sub>g</sub> mixing*

The ground state is  $|L^4E_g^0\rangle$ , which corresponds to O 2p  $E_g^4$  and Ln 5d  $E_g^0$ . This state is spatially degenerate, and the model may be more conveniently applied by considering each component of the ground state separately since they interact with different excited states. The spatially degenerate wavefunctions of ground state are given by  $\psi_1$  and  $\psi_2$ , which correspond to the empty  $d_z^2$  and empty  $d_{x^2-y^2}$  orbitals and the matching, filled O 2p SALCs, respectively. The energy of  $\psi_1$  and  $\psi_2$  is 0. The excited state that interacts with  $\psi_1$  is  $|L^3E_g^1\rangle$ , which 16-fold degenerate and given by  $\psi_3 - \psi_{18}$ . The individual states are shown in Table S1. Only states in which the electron can hop from the occupied O 2p  $E_g$  orbitals into the Ln 5d  $E_g$  orbitals without changing sign can interact with the ground state:  $\psi_{1a}$  can interact with  $\psi_2$  and  $\psi_7$ , and  $\psi_{1b}$  can interact with  $\psi_{12}$  and  $\psi_{17}$ . The other states cannot interact with  $\psi_1$  and are excluded from the model.

Table S1:  $E_g^3 5d E_g^1$  basis states for the Hubbard molecule model for LnO<sub>2</sub>. The spatially degenerate orbitals are indicated by the curved brackets. Only the states in red are used in the model.

| O 2p $E_g^3$ | Ce 5d $E_g^1$ states |             |             |             |
|--------------|----------------------|-------------|-------------|-------------|
| states       | (↑)( )               | (↓)( )      | ( ) (↑)     | ( ) (↓)     |
| (↓)(↑↓)      | $\psi_3$             | $\psi_7$    | $\psi_{11}$ | $\psi_{15}$ |
| (↑)(↑↓)      | $\psi_4$             | $\psi_8$    | $\psi_{12}$ | $\psi_{16}$ |
| (↑↓)(↓)      | $\psi_5$             | $\psi_9$    | $\psi_{13}$ | $\psi_{17}$ |
| (↑↓)(↑)      | $\psi_6$             | $\psi_{10}$ | $\psi_{14}$ | $\psi_{18}$ |

The Hubbard molecule model Hamiltonian for the 5d  $E_g$  orbitals in LnO<sub>2</sub> can be described using the following matrix for each of the two spatially independent wavefunctions  $\psi_1$  and  $\psi_2$ .

$$\mathbf{A} = \begin{pmatrix} 0 & -t & -t \\ -t & U' & 0 \\ -t & 0 & U' \end{pmatrix}, \text{ where } \begin{pmatrix} 1 \\ 0 \\ 0 \end{pmatrix} = \psi_1 \text{ (or } \psi_2), \begin{pmatrix} 0 \\ 1 \\ 0 \end{pmatrix} = \psi_3 \text{ (or } \psi_{13}), \text{ and } \begin{pmatrix} 0 \\ 0 \\ 1 \end{pmatrix} = \psi_8 \text{ (or } \psi_{18}),$$

and  $t$  is the electron hopping term (interaction integral), which is analogous to off-diagonal matrix element,  $H_{ij}$ , (orbital interaction integral) in MO theory.

For each of the two spatially independent components of  $\psi_1$ , the eigenvalues for the model are 0 (singly degenerate) and  $E_{\pm} = \frac{1}{2}(U' \pm \sqrt{U'^2 + 8t^2})$ . The eigenvectors we care about are  $\psi_{\pm}$ , which have energies  $E_{\pm}$ . The eigenvectors are determined by solving  $\mathbf{A} - E_{\pm}\mathbf{I} = \mathbf{0}$ . From the last 2 rows of  $\mathbf{A}$ , we get  $a_2 = a_7 (= a_{12} = a_{17})$ , and from the first row, we get  $-E_{\pm}a_1 = t(a_2 + a_7) = 2ta_2$  or  $a_2 = a_7 = -(E_{\pm}/2t)a_1$  taking  $a_1 = 1$ , we get  $\psi_{\pm} = \psi_{1a} - (E_{\pm}/2t)[\psi_2 + \psi_7]$ . Since  $|L^4E_g^0\rangle$  is  $\psi_{1a}$  and  $|L^3E_g^1\rangle$  is  $(\psi_2 + \psi_7)/\sqrt{2}$ ,  $\psi_{\pm}$  can be expressed as  $\psi_{\pm} = |L^4E_g^0\rangle - (E_{\pm}/\sqrt{2}t)|L^3E_g^1\rangle$ , which is not normalized. The normalized wavefunction is given by  $\psi_{\pm} = N[|L^4E_g^0\rangle + \lambda|L^3E_g^1\rangle]$ , where  $N = 1/\sqrt{1 + \lambda^2}$ , and  $\lambda = -E_{\pm}/\sqrt{2}t$ ,

$$E_{\pm} = \frac{1}{2}(U' \pm \sqrt{U'^2 + 8t^2}) \psi_{\pm} = N[|L^4E_g^0\rangle + \lambda|L^3E_g^1\rangle], \text{ where } N = 1/\sqrt{1 + \lambda^2}, \text{ and } \lambda = -E_{\pm}/\sqrt{2}t. \\ E_{\text{MLCT}} = \sqrt{U'^2 + 8t^2} \text{ and } n_f = 2(\lambda^2/N^2).$$

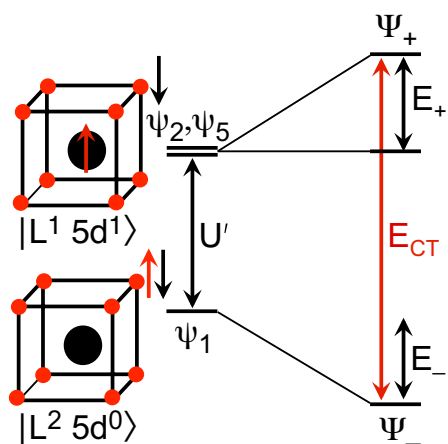

| $ L^1 5d^1\rangle$ | $5d^1 (\uparrow)$ | $5d^1 (\downarrow)$ |
|--------------------|-------------------|---------------------|
| $L^1 (\downarrow)$ | $\psi_2$          | $\psi_4$            |
| $L^1 (\uparrow)$   | $\psi_3$          | $\psi_5$            |

$\psi_1$  is  $|L^2 5d^0\rangle$

**Figure S2.** HMM for one of the spatially degenerate 5d interactions in  $\text{LnO}_2$  (left), and its basis states (right).

*Hubbard molecule model for LnO<sub>2</sub>: O 2p and Ln 5d, T<sub>2g</sub> mixing*

The ground state is  $|L^6 T_{2g}^0\rangle$ , which corresponds to O 2p  $T_{2g}^6$  and Ln 5d  $T_{2g}^0$ . This state is triply spatially degenerate and consists of wavefunctions  $\psi_1$ ,  $\psi_2$ , and  $\psi_3$ . The energy of  $\psi_1$ ,  $\psi_2$ , and  $\psi_3$  is 0. The excited state that interacts with  $\psi_1$ ,  $\psi_2$ , and  $\psi_3$  is  $|L^5 T_{2g}^1\rangle$ , which 36-fold degenerate and given by  $\psi_4 - \psi_{39}$ . The individual states are shown in Table S1. Only states in which the electron can hop from the occupied O 2p  $E_g$  orbitals into the Ln 5d  $E_g$  orbitals without changing sign can interact with the ground state:  $\psi_{1a}$  can interact with  $\psi_2$  and  $\psi_7$ , and  $\psi_{1b}$  can interact with  $\psi_{12}$  and  $\psi_{17}$ , and  $\psi_{1c}$  can interact with  $\psi_{30}$  and  $\psi_{37}$ . The other states cannot interact with  $\psi_1$  and are excluded from the model.

Table S1:  $T_{2g}^5 5d T_{2g}^1$  basis states for the Hubbard molecule model of LnO<sub>2</sub>. The spatially degenerate orbitals are indicated by the curved brackets. Only the states in red are used in the model.

| O 2p $T_{2g}^5$<br>states                              | Ln 5d $T_{2g}^1$ states for $(d_{xz})(d_{yz})(d_{xy})$ |                                        |                                    |                                      |                                    |                                      |
|--------------------------------------------------------|--------------------------------------------------------|----------------------------------------|------------------------------------|--------------------------------------|------------------------------------|--------------------------------------|
|                                                        | $(\uparrow)(\uparrow)(\uparrow)$                       | $(\downarrow)(\downarrow)(\downarrow)$ | $(\uparrow)(\downarrow)(\uparrow)$ | $(\downarrow)(\uparrow)(\downarrow)$ | $(\uparrow)(\downarrow)(\uparrow)$ | $(\downarrow)(\uparrow)(\downarrow)$ |
| $(\downarrow)(\uparrow\downarrow)(\uparrow\downarrow)$ | $\psi_4$                                               | $\psi_{10}$                            | $\psi_{16}$                        | $\psi_{22}$                          | $\psi_{28}$                        | $\psi_{34}$                          |
| $(\uparrow)(\uparrow\downarrow)(\uparrow\downarrow)$   | $\psi_5$                                               | $\psi_{11}$                            | $\psi_{17}$                        | $\psi_{23}$                          | $\psi_{29}$                        | $\psi_{35}$                          |
| $(\uparrow\downarrow)(\downarrow)(\uparrow\downarrow)$ | $\psi_6$                                               | $\psi_{12}$                            | $\psi_{18}$                        | $\psi_{24}$                          | $\psi_{30}$                        | $\psi_{36}$                          |
| $(\uparrow\downarrow)(\uparrow)(\uparrow\downarrow)$   | $\psi_7$                                               | $\psi_{13}$                            | $\psi_{19}$                        | $\psi_{25}$                          | $\psi_{31}$                        | $\psi_{37}$                          |
| $(\uparrow\downarrow)(\uparrow\downarrow)(\downarrow)$ | $\psi_8$                                               | $\psi_{14}$                            | $\psi_{20}$                        | $\psi_{26}$                          | $\psi_{32}$                        | $\psi_{38}$                          |
| $(\uparrow\downarrow)(\uparrow\downarrow)(\uparrow)$   | $\psi_9$                                               | $\psi_{15}$                            | $\psi_{21}$                        | $\psi_{27}$                          | $\psi_{33}$                        | $\psi_{39}$                          |

The Hubbard molecule model Hamiltonian for the 5d  $T_{2g}$  orbitals in LnO<sub>2</sub> can be described using the following matrix for each of the three spatially independent components of  $\psi_1$ .

$$\mathbf{A} = \begin{pmatrix} 0 & -t & -t \\ -t & U' & 0 \\ -t & 0 & U' \end{pmatrix}, \text{ where } \begin{pmatrix} 1 \\ 0 \\ 0 \end{pmatrix} = \psi_1, \psi_2, \text{ or } \psi_3, \begin{pmatrix} 0 \\ 1 \\ 0 \end{pmatrix} = \psi_4, \psi_{18}, \text{ or } \psi_{32}, \text{ and } \begin{pmatrix} 0 \\ 0 \\ 1 \end{pmatrix} = \psi_{11}, \psi_{25} \text{ or } \psi_{39}$$

$t$  is the electron hopping term (interaction integral), which is analogous to off-diagonal matrix element,  $H_{ij}$ , (orbital interaction integral) in MO theory.

For each of the three spatially independent components of  $|L^6 T_{2g}^0\rangle$ , the eigenvalues for the model are 0 (singly degenerate) and  $E_{\pm} = \frac{1}{2}(U' \pm \sqrt{U'^2 + 8t^2})$ . The eigenvectors we care about are  $\psi_{\pm}$ , which have energies  $E_{\pm}$ . The eigenvectors are determined by solving  $\mathbf{A} - E_{\pm} \mathbf{I} = \mathbf{0}$ . From the last 2 rows of  $\mathbf{A}$ , we get  $a_4 = a_{11} = a_{18} = a_{25} = a_{32} = a_{39}$ , and from the first row, we get  $-E_{\pm} a_1 = t(a_4 + a_{11}) = 2ta_4$  or  $a_4 = a_{11} = -(E_{\pm}/2t)a_1$  taking  $a_1 = 1$ , we get  $\psi_{\pm} = \psi_1 - (E_{\pm}/2t)[\psi_4 + \psi_9]$ . Since  $|L^6 T_{2g}^0\rangle$  is  $\psi_1$  and  $|L^5 T_{2g}^1\rangle$  is  $(\psi_4 + \psi_{11})/\sqrt{2}$ , so  $\psi_{\pm} = N[|L^6 T_{2g}^0\rangle - (E_{\pm}/\sqrt{2}t)|L^5 T_{2g}^1\rangle]$ , where  $N=1/\sqrt{1 + \lambda^2}$ , and  $\lambda = -E_{\pm}/\sqrt{2}t$ :

$$E_{\pm} = \frac{1}{2}(U' \pm \sqrt{U'^2 + 8t^2}) \text{ and } \psi_{\pm} = N[|L^6 E_g^0\rangle + \lambda|L^5 E_g^1\rangle], \text{ where } N=1/\sqrt{1 + \lambda^2}, \text{ and } \lambda = -E_{\pm}/\sqrt{2}t. E_{MLCT} = \sqrt{U'^2 + 8t^2} \text{ and } n_f = 3(\lambda^2/N^2).$$



*HMM to second order for CeO<sub>2</sub> 4f interaction*

The energies can be determined to second order by solving  $|\mathbf{A}-E\mathbf{S}| = 0$ , where  $\mathbf{A}$  is Hamiltonian for the HMM and  $\mathbf{S}$  are the overlap integrals.  $S_{ii}$  is equal to 1 and there is only one unique value of  $S_{ij}$ , which can be shortened to  $S$ . For the CeO<sub>2</sub> 4f interaction, the determinant is given below

$$\begin{vmatrix} -E & 0 & -t - ES \\ 0 & -E & -t - ES \\ -t - ES & -t - ES & U' - E \end{vmatrix} = 0 \text{ with } t = -S(2E_F + U'), \text{ and } E_F = -7.4 \text{ eV}$$

The eigenvalues are 0 and  $E_{\pm} = \frac{1}{2(1-2S^2)} (U' + 4St \pm \sqrt{U'^2 + 8t^2 + 8U'St})$ . The eigenvectors

of interest are  $\psi_{\pm}$ , which have energies  $E_{\pm}$ . The eigenvectors are determined from  $\mathbf{A}-E_{\pm}\mathbf{S} = \mathbf{0}$ . From the first 2 rows of  $\mathbf{A}$ ,  $a_1 = a_4$  and  $E_{\pm}a_1 = (-t - E_{\pm}S)a_5$  or  $a_5 = -E_{\pm}/(t + E_{\pm}S) a_1$ , where  $a_i$  is the coefficient of  $\psi_i$ . Using  $a_1 = 1$ , the unnormalized wavefunction is  $\psi_{\pm} = \psi_1 + \psi_4 - E_{\pm}/(t + E_{\pm}S)\psi_5$ .

The normalization constant,  $N$ , is  $1/\sqrt{2 + (E_{\pm}/(t + E_{\pm}S))^2}$ . The  $\psi_{\pm}$  can be simplified by dividing by  $\sqrt{2}$  to give  $\psi_{\pm} = N \left[ (\psi_1 + \psi_4)/\sqrt{2} - (E_{\pm}/\sqrt{2} (t + E_{\pm}S)) \psi_5 \right]$ , with

$N = 1/\sqrt{1 + (E_{\pm}/\sqrt{2} (t + E_{\pm}S))^2}$ . Finally,  $(\psi_1 + \psi_4)/\sqrt{2}$  can be more conveniently represented as  $|L^1 4f^1\rangle$  and  $\psi_5$  by  $|L^2 4f^0\rangle$ , to give the following:

$$E_{\pm} = \frac{1}{2(1-2S^2)} (U' + 4St \pm \sqrt{U'^2 + 8t^2 + 8U'St}) \text{ and } \psi_{\pm} = N(|L^1 4f^1\rangle + \lambda_{\pm}|L^2 4f^0\rangle) \text{ where } N = 1/\sqrt{1 + \lambda_{\pm}^2}, \lambda_{\pm} = -E_{\pm}/[\sqrt{2}(t + E_{\pm}S)].$$

$$E_{CT} = \frac{1}{1-2S^2} (\sqrt{U'^2 + 8t^2 + 8U'St}) \text{ and } n_f = 1/N^2. t = -S(2E_F + U') \text{ with } E_F = -7.4 \text{ eV.}$$

*HMM to second order for PrO<sub>2</sub> 4f interactions.*

The model for PrO<sub>2</sub> is the same as for CeO<sub>2</sub>.

$$E_{\pm} = \frac{1}{2(1-2S^2)} (U' + 4St \pm \sqrt{U'^2 + 8t^2 + 8U'St}) \text{ and } \psi_{\pm} = N(|L^1 4f^1\rangle + \lambda|L^2 4f^0\rangle) \text{ where}$$

$$N=1/\sqrt{1+\lambda^2}, \lambda_{\square} = -E_{\pm}/[\sqrt{2}(t + E_{\pm}S)]. E_{\text{MLCT}} = \frac{1}{1-2S^2} (\sqrt{U'^2 + 8t^2 + 8U'St}) \text{ and } n_f = 1/N^2.$$

Using  $t = -S(2E_F + U')$  with  $E_F -7.4$  eV.

*HMM to second order for TbO<sub>2</sub> 4f interactions.*

The HMM for TbO<sub>2</sub> can be expressed as doubly degenerate (spin degenerate) with

$$\mathbf{A} = \begin{pmatrix} 0 & -t \\ -t & U' \end{pmatrix}, \text{ where } \begin{pmatrix} 1 \\ 0 \end{pmatrix} = \psi_{\square} \text{ or } \psi_2, \begin{pmatrix} 0 \\ 1 \end{pmatrix} = \psi_3 \text{ or } \psi_4$$

$$\text{Solving } |\mathbf{A}-E\mathbf{S}| = 0 \text{ gives } E_{\pm} = \frac{1}{2(1-S^2)} (U' + 2St \pm \sqrt{U'^2 + 4t^2 + 4U'St}) \text{ and } \psi_{\pm} = N(|L^2 4f^0\rangle +$$

$$\lambda|L^1 4f^1\rangle) \text{ where } N=1/\sqrt{1+\lambda^2}, \lambda_{\square} = -E_{\pm}/[(t + E_{\pm}S)]. E_{\text{CT}} = \frac{1}{1-S^2} (\sqrt{U'^2 + 4t^2 + 4U'St}) \text{ and } n_f$$

$$= 2\lambda^{\square}/N^2. t = -S(2E_F + U') \text{ with } E_F -7.4 \text{ eV.}$$

*HMM to second order for LnO<sub>2</sub>: O 2p and Ln 5d interactions*

The HMMs for the T<sub>2g</sub> and E<sub>g</sub> interactions are essentially the same apart from their spatial degeneracy. In both cases, the interaction can be broken into non-degenerate cases (e.g., the double degenerate E<sub>g</sub> interaction can be divided into the d<sub>z<sup>2</sup></sub> and d<sub>x<sup>2</sup>-y<sup>2</sup></sub> interactions). For each of the non-degenerate cases, the HMM can be expressed as

$$\mathbf{A} = \begin{pmatrix} 0 & -t & -t \\ -t & U' & 0 \\ -t & 0 & U' \end{pmatrix}, \text{ where } \begin{pmatrix} 1 \\ 0 \\ 0 \end{pmatrix} = |L^2 5d^0\rangle \text{ and } \begin{pmatrix} 0 \\ 1 \\ 0 \end{pmatrix} \text{ and } \begin{pmatrix} 0 \\ 0 \\ 1 \end{pmatrix} \text{ are } |L^1 5d^1\rangle.$$

Solving  $|\mathbf{A}-E\mathbf{S}| = 0$  gives the same solution as for CeO<sub>2</sub> 4f interactions.  $E_{\pm} = \frac{1}{2(1-2S^2)} \left( U' + 4St \pm \sqrt{U'^2 + 8t^2 + 8U'St} \right)$  and  $\psi_{\pm} = N(|L^1 4f^1\rangle + \lambda|L^2 4f^0\rangle)$  where  $N = 1/\sqrt{1 + \lambda^2}$ ,  $\lambda_{\square} = -E_{\pm}/[\sqrt{2}(t + E_{\pm}S)]$ ,

$E_{CT} = \frac{1}{1-2S^2} \left( \sqrt{U'^2 + 8t^2 + 8U'St} \right)$  and  $n_f = n_{deg}\lambda^2/N^2$ , where  $n_{deg}$  is the degree of degeneracy.  $t = -S(2E_F + U')$  with  $E_F = -7.4$  eV.

## Experimental details

**Magnetic susceptibility measurements.** In an argon filled glovebox, samples were loaded into 3 mm OD quartz tubes by sandwiching them between two plugs of quartz wool. The samples were compressed into a pellet by squeezing them between two quartz rods. The quartz rods were removed, and the ends of the tube were capped by inserting them into septa for 7 mm tubing. The capped tube was removed from the glovebox. The center of the tube was wrapped with a Kimwipe, saturated with liquid nitrogen, and sealed with a propane/oxygen torch. Variable temperature magnetization data were recorded at 1 T, 2 T, and 4 T using a Quantum Designs MPMS SQUID magnetometer.

Variable temperature magnetization was corrected for the diamagnetism of the quartz wool using Pascal's constants for covalent compounds,  $\chi_{\text{QW}} = 3.7 \times 10^{-7} \text{ emu g}^{-1}$  (no correction for the diamagnetism of the quartz tube is needed as it never leaves the SQUID coils). Molar susceptibility was calculated using the following equation:

$$\chi_{\text{mol}} = \frac{(\text{molecular weight})}{(\text{sample mass})} \left[ \frac{(M_{\text{meas}} - M_{\text{ferro}})}{H} - \chi_{\text{QW}} \right] - \chi_{\text{dia}}$$

Where  $\chi_{\text{mol}}$  is the molar susceptibility,  $M_{\text{meas}}$  is the measured magnetization,  $M_{\text{ferro}}$  is the magnetization of the ferromagnetic impurity, which is temperature and field- independent;  $\chi_{\text{QW}}$  is the contribution to the susceptibility due to the quartz wool,  $\chi_{\text{dia}}$  is the diamagnetic correction determined using Pascal's constants, and  $H$  is the applied field.

Two ferromagnetic impurities are commonly encountered in laboratory samples, ferrous metals and magnetite or other ferrites from the oxide coating on stainless steel lab equipment. Of these, magnetite is far more likely to be encountered. In general, the magnetization of ferromagnets is temperature independent below the Curie temperature, which is 860 K for magnetite, so magnetization of the impurity is temperature independent for this experiment. The magnetization of magnetite reaches saturation at approximately 0.2 T, above which the magnetization is  $\sim 90 \text{ emu/g}$ . Below this field, the magnetization of magnetite is roughly linear with applied field. Based on the assumption that the impurity is magnetite or a related ferrite resulting from the abrasion of stainless steel lab equipment, the data were corrected for a temperature and field independent ferromagnetic impurity.  $M_{\text{ferro}}$  was allowed to vary to minimize the least squares difference between  $\chi_{\text{mol}}$  at different fields. Variable temperature magnetic susceptibility data including before and after the correction for ferromagnetic impurities are included in the SI.

**Diffuse reflectance (DR) measurements.** DR spectra were obtained with an Ocean Optics T3000 spectrometer equipped with a diffuse reflectance probe. Samples were smeared onto a glass microscope slide covered with several layers of poly-tetrafluoroethylene (PTFE) tape. The blank spectrum was obtained from the PTFE-covered microscope slide prior to taking the data on the compound. Reflectance data were converted to  $F(R_{\infty})$  using the Kubelka-Munk transform.<sup>1</sup> The DR spectra were normalized by setting the lowest absorbance of the spectrum to zero (Figures S1 and S2).

**Charge-transfer band gap energy ( $E_{\text{BG}}$ ) determination.** Tauc plots were generated assuming that the O 2p to Ln 4f and 5d transitions are allowed, direct transitions.<sup>1-3</sup> The band gap was determined using the approach described by Makula et al.<sup>1</sup> Briefly, the data are plotted as  $[F(R_{\infty}) \cdot h\nu]^2$  vs  $h\nu$  (DR spectra) or  $(\alpha \cdot h\nu)^2$  vs  $h\nu$  (XANES spectra), where  $\alpha$  is the absorbance. The regions below and above the transition are fit to straight lines. The intercept of these lines is

the band gap. In the case of the O 2p to 4f transitions in the DR spectra of LnO<sub>2</sub>, the intercept with the x-axis was used instead of fitting the region before the transition. To determine the CeO<sub>2</sub> O 2p to Ce 5d band gaps, the CeO<sub>2</sub> absorption spectrum reported by Niwano et al. was digitized using the program UN-SCAN-IT, and the band gaps were determined using the approach described by Makula et al.<sup>1, 4-5</sup> The uncertainty in Tauc plot determinations of band gaps is typically reported as 0.03 eV. Based on work on CeO<sub>2</sub> thin films, we assume the uncertainty is slightly larger, 0.05 eV, for the band gap determined from the UV-Visible DR data (the numerical error from fitting the Tauc plots is smaller).<sup>6</sup>

**Least Squares fitting and uncertainty analysis.** Least squares fitting of the XANES pre-edge energies to the charge transfer band gap energies with errors in both dimensions was performed as described in “Numerical Recipes.”<sup>7</sup> Uncertainties in the modeled parameters,  $\sigma_f$ , were determined using  $\sigma_f^2 = \sum_i \left( \frac{\partial f}{\partial x_i} \right)^2 \sigma_{x_i}^2$ , where  $\sigma_{x_i}$  is the uncertainty of measured property  $x_i$ , and the derivatives were determined numerically.

#### References

1. Makula, P.; Pacia, M.; Macyk, W., How To Correctly Determine the Band Gap Energy of Modified Semiconductor Photocatalysts Based on UV–Vis Spectra. *The Journal of Physical Chemistry Letters* **2018**, *9* (23), 6814-6817.
2. Sun, L.; Xiao, W.; Hao, X.; Meng, Q.; Zhou, M., A first-principles study on the structural, thermal and electronic properties of cerium oxides by using different functionals. *Electronic Structure* **2018**, *1* (1), 015003.
3. Tauc, J.; Grigorovici, R.; Vancu, A., Optical Properties and Electronic Structure of Amorphous Germanium. *physica status solidi (b)* **1966**, *15* (2), 627-637.
4. Silk Scientific Corporation *UN-SCAN-IT 5.2*, 2012.
5. Niwano, M.; Sato, S.; Koide, T.; Shidara, T.; Fujimori, A.; Fukutani, H.; Shin, S.; Ishigame, M., Optical Properties of CeO<sub>2</sub> Crystal in the Photon Energy Range of 2.5–40 eV. *Journal of the Physical Society of Japan* **1988**, *57* (4), 1489-1496.
6. Chiu, F.-C.; Lai, C.-M., Optical and electrical characterizations of cerium oxide thin films. *Journal of Physics D: Applied Physics* **2010**, *43* (7), 075104.
7. Press, W. H.; Teukolsky, S. A.; Vetterling, W. T.; Flannery, B. P., *Numerical Recipes in FORTRAN The Art of Scientific Computing, Second Ed.* Cambridge University Press: New York, 1992.

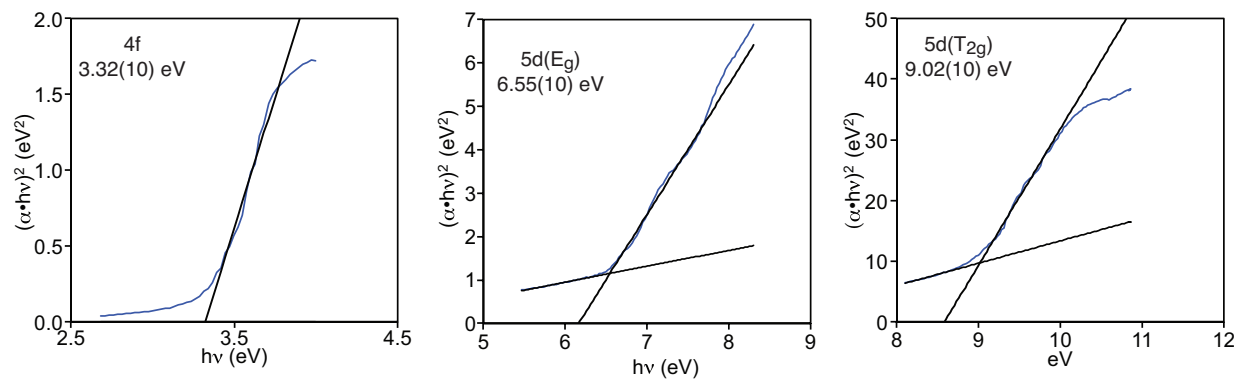

**Figure S3.** Tauc plots for  $\text{CeO}_2$  from the data published by Niwano, et al.<sup>5</sup> Band gap given in the upper left corner of each plot.

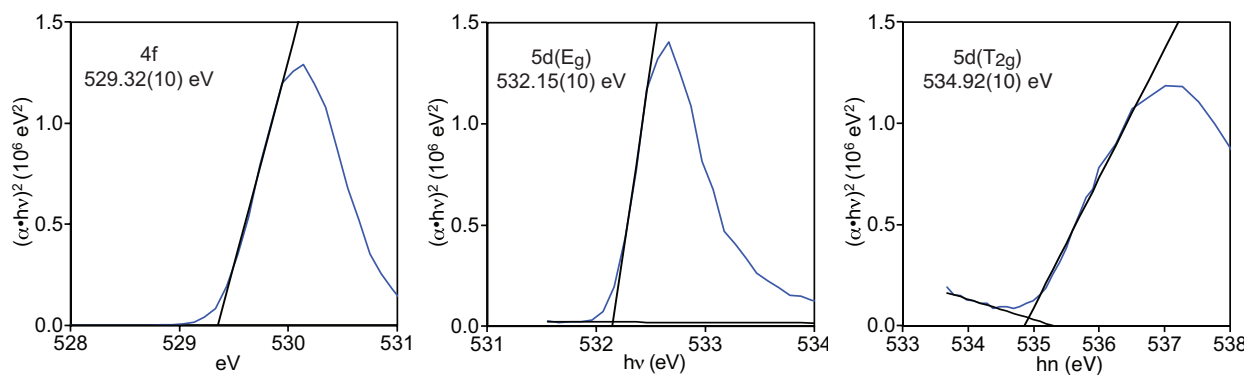

**Figure S4.** Tauc plots for CeO<sub>2</sub> O K-edge XANES pre-edge peaks. Band gap given in the upper left corner of each plot.

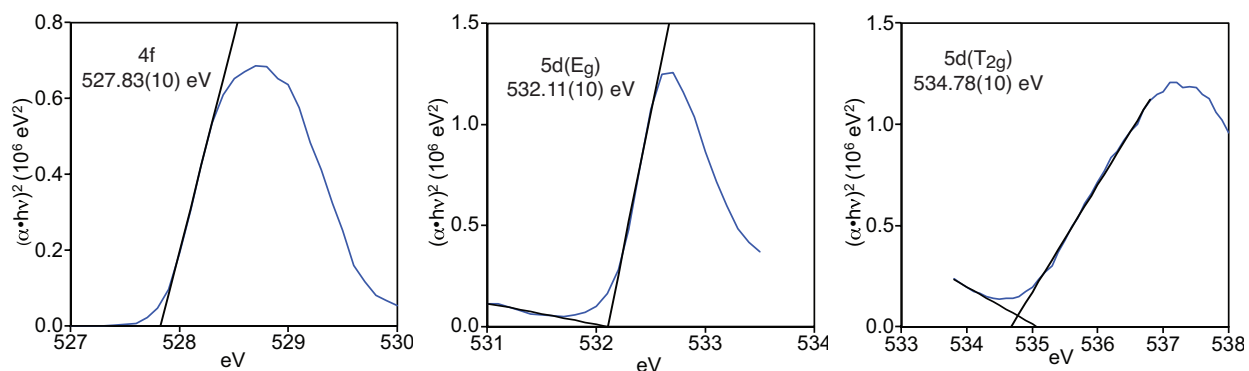

**Figure S5.** Tauc plots for PrO<sub>2</sub> O K-edge XANES pre-edge peaks. Band gap given in the upper left corner of each plot.

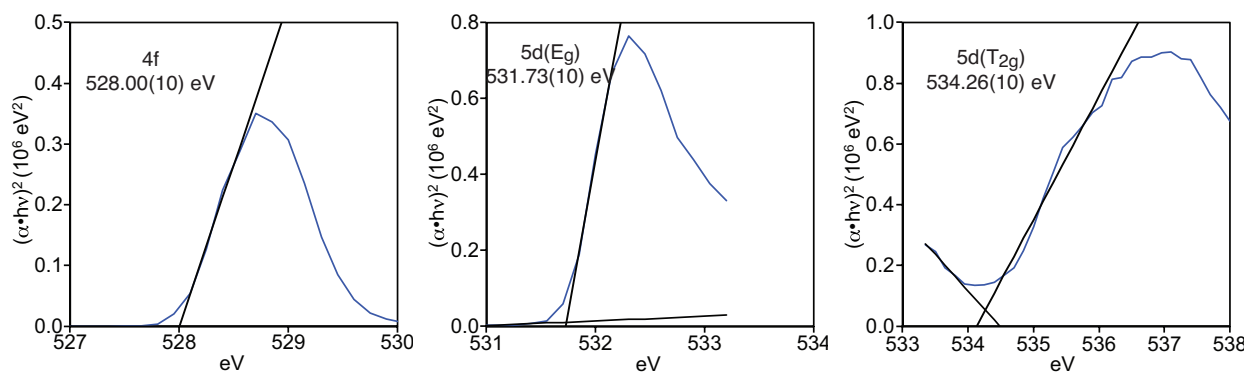

**Figure S6.** Tauc plots for TbO<sub>2</sub> O K-edge XANES pre-edge peaks. Band gap given in the upper left corner of each plot.

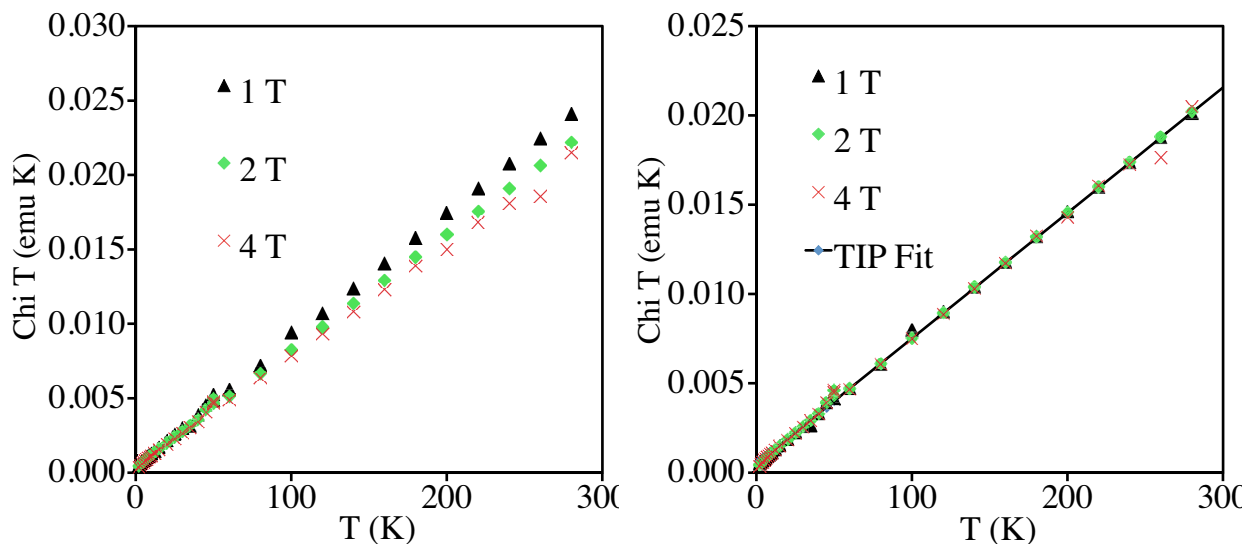

**Figure S7.** Magnetic Susceptibility of CeO<sub>2</sub> from Aldrich, dried under vacuum for 48 hr. Data are corrected for underlying diamagnetism using Pascal's constants. (left) Data before correction for a ferromagnetic impurity. (right) Data corrected for a ferromagnetic impurity.

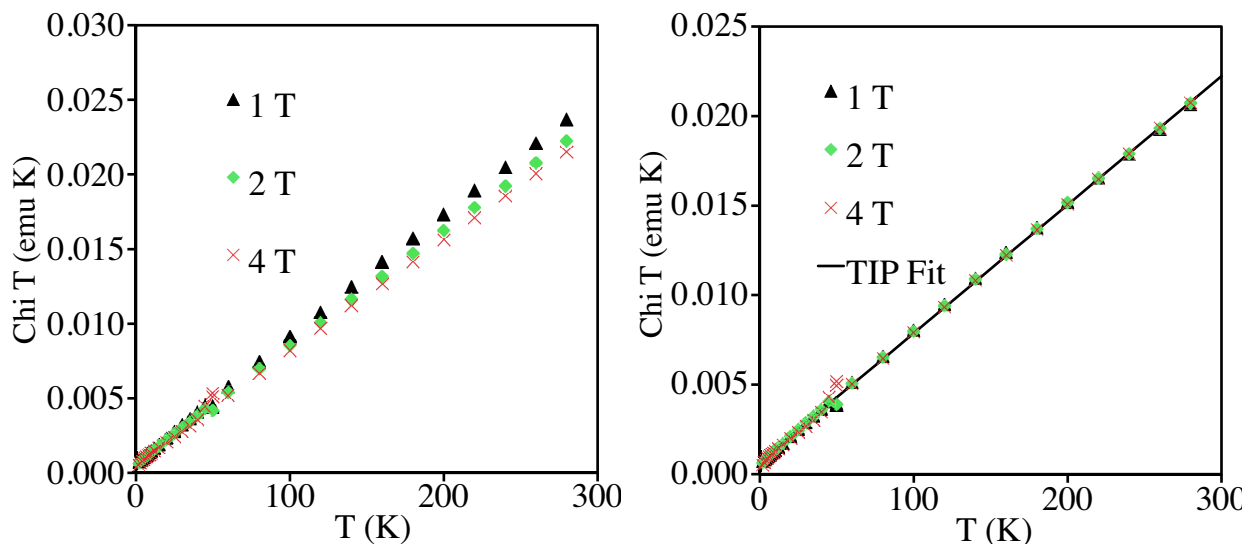

**Figure S8.** Magnetic Susceptibility of CeO<sub>2</sub> from Strem, dried under vacuum for 48 hr. Data are corrected for underlying diamagnetism using Pascal's constants. (left) Data before correction for a ferromagnetic impurity. (right) Data corrected for a ferromagnetic impurity.
